# Supplementary material
Source: PubMed Central journal article supplement (PMC7437369)
Supplement: Supplemental_Material.pdf [file Supplemental_Material.pdf]

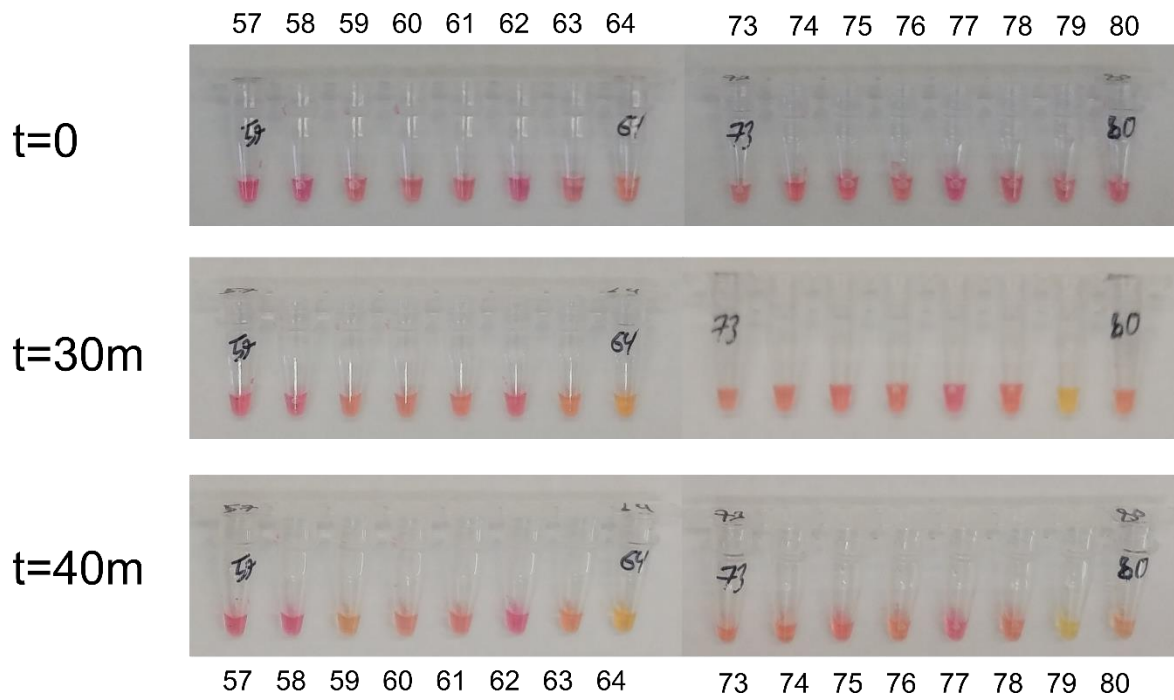

**Supplementary figure 1:**

Representative pictures of data related to Figure 1d,e and Supp. Table 1. RT-LAMP reaction products at t = 0, 30 and 40 minutes are shown. Numbers above and under each tube corresponds to the number of the sample in Supp. Table 1.

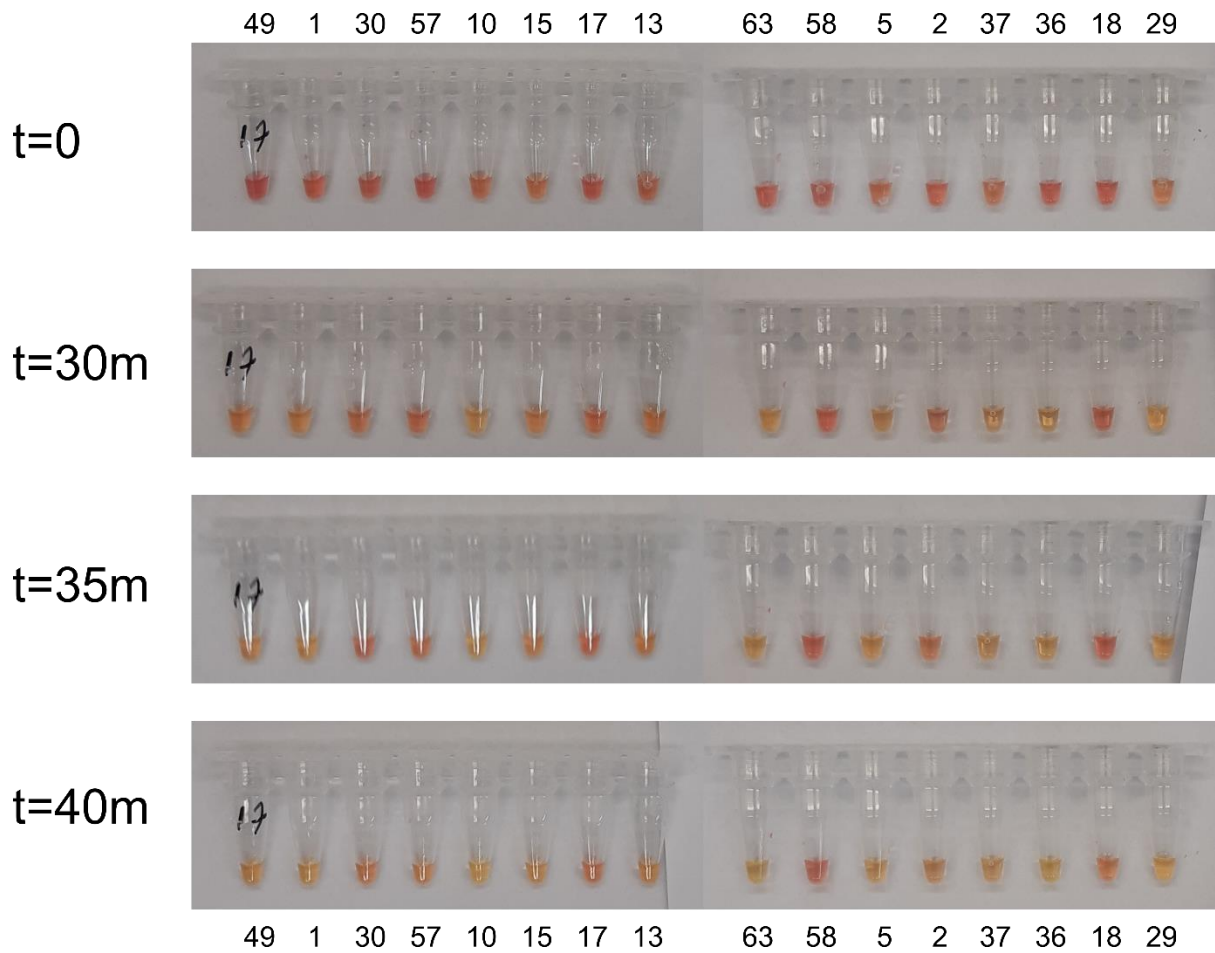

**Supplementary figure 2:**

Representative pictures of data presented in Figure 2 and Supp. Table 2. RT-LAMP reaction products at  $t = 30, 35$  and  $40$  minutes are shown. Numbers above and under each tube corresponds to the number of the sample in Supp. Table 2.

**Supplementary Table 1:**

| Sample# | Sample type | Ct | RT-PCR result | Swab buffer                          | Test results t(30) min (0-negative, 1-positive) | Test results t(40) min (0-negative, 1-positive) |
|---------|-------------|----|---------------|--------------------------------------|-------------------------------------------------|-------------------------------------------------|
| 1       | Swab        | -  | 0             | Serological tube red cup Pink buffer | 0                                               | 0                                               |
| 2       | Swab        | -  | 0             | Serological tube red cup Pink buffer | 0                                               | 0                                               |
| 3       | Swab        | -  | 0             | Serological tube red cup Pink buffer | 0                                               | 0                                               |
| 4       | Swab        | -  | 0             | Serological tube red cup Pink buffer | 0                                               | 0                                               |
| 5       | Swab        | -  | 0             | Serological tube red cup Pink buffer | 0                                               | 0                                               |
| 6       | Swab        | -  | 0             | Serological tube red cup Pink buffer | 0                                               | 0                                               |
| 7       | Swab        | -  | 0             | Serological tube red cup Pink buffer | 0                                               | 0                                               |
| 8       | Swab        | -  | 0             | Serological tube red cup Pink buffer | 0                                               | 0                                               |
| 9       | Swab        | -  | 0             | Serological tube red cup Pink buffer | 0                                               | 0                                               |
| 10      | Swab        | -  | 0             | Serological tube red cup Pink buffer | 0                                               | 0                                               |
| 11      | Swab        | -  | 0             | Serological tube red cup Pink buffer | 0                                               | 0                                               |
| 12      | Swab        | -  | 0             | Serological tube red cup Pink buffer | 0                                               | 0                                               |
| 13      | Swab        | -  | 0             | Serological tube red cup Pink buffer | 0                                               | 0                                               |
| 14      | Swab        | -  | 0             | Serological tube red cup Pink buffer | 0                                               | 0                                               |
| 15      | Swab        | -  | 0             | Serological tube red cup Pink buffer | 0                                               | 0                                               |
| 16      | Swab        | -  | 0             | Serological tube red cup Pink buffer | 0                                               | 0                                               |
| 17      | Swab        | -  | 0             | Serological tube red cup Pink buffer | 0                                               | 0                                               |
| 18      | Swab        | -  | 0             | Serological tube red cup Pink buffer | 0                                               | 0                                               |
| 19      | Swab        | -  | 0             | Serological tube red cup Pink buffer | 0                                               | 0                                               |
| 20      | Swab        | -  | 0             | Serological tube red cup Pink buffer | 0                                               | 0                                               |
| 21      | Swab        | -  | 0             | Serological tube red cup Pink buffer | 0                                               | 0                                               |
| 22      | Swab        | -  | 0             | Serological tube red cup Pink buffer | 0                                               | 0                                               |
| 23      | Swab        | -  | 0             | Serological tube red cup Pink buffer | 0                                               | 0                                               |
| 24      | Swab        | -  | 0             | Serological tube red cup Pink buffer | 0                                               | 0                                               |
| 25      | Swab        | -  | 0             | Serological tube red cup Pink buffer | 0                                               | 0                                               |
| 26      | Swab        | -  | 0             | Serological tube red cup Pink buffer | 0                                               | 0                                               |
| 27      | Swab        | -  | 0             | Serological tube red cup Pink buffer | 0                                               | 0                                               |
| 28      | Swab        | -  | 0             | Serological tube red cup Pink buffer | 0                                               | 0                                               |
| 29      | Swab        | -  | 0             | Serological tube red cup Pink buffer | 0                                               | 0                                               |
| 30      | Swab        | -  | 0             | Serological tube red cup Pink buffer | 0                                               | 0                                               |
| 31      | Swab        | -  | 0             | Serological tube red cup Pink buffer | 0                                               | 0                                               |
| 32      | Swab        | -  | 0             | Serological tube red cup Pink buffer | 0                                               | 0                                               |
| 33      | Swab        | -  | 0             | Serological tube red cup Pink buffer | 0                                               | 0                                               |
| 34      | Swab        | -  | 0             | Serological tube red cup Pink buffer | 0                                               | 0                                               |
| 35      | Swab        | -  | 0             | Serological tube red cup Pink buffer | 0                                               | 0                                               |
| 36      | Swab        | -  | 0             | Serological tube red cup Pink buffer | 0                                               | 0                                               |
| 37      | Swab        | -  | 0             | Serological tube red cup Pink buffer | 0                                               | 0                                               |
| 38      | Swab        | -  | 0             | Serological tube red cup Pink buffer | 0                                               | 0                                               |
| 39      | Swab        | -  | 0             | Serological tube red cup Pink buffer | 0                                               | 0                                               |

|    |      |       |   |                                         |   |   |
|----|------|-------|---|-----------------------------------------|---|---|
| 40 | Swab | -     | 0 | Serological tube red cup Pink buffer    | 0 | 0 |
| 41 | Swab | -     | 0 | Serological tube red cup Pink buffer    | 0 | 0 |
| 42 | Swab | -     | 0 | Serological tube red cup Pink buffer    | 0 | 0 |
| 43 | Swab | -     | 0 | Serological tube red cup Pink buffer    | 0 | 0 |
| 44 | Swab | -     | 0 | Serological tube red cup Pink buffer    | 0 | 0 |
| 45 | Swab | -     | 0 | Serological tube red cup Pink buffer    | 0 | 0 |
| 46 | Swab | -     | 0 | Serological tube red cup Pink buffer    | 0 | 0 |
| 47 | Swab | -     | 0 | Serological tube red cup Pink buffer    | 0 | 0 |
| 48 | Swab | -     | 0 | Serological tube red cup Pink buffer    | 0 | 0 |
| 49 | Swab | -     | 0 | Serological tube red cup Pink buffer    | 0 | 0 |
| 50 | Swab | -     | 0 | Serological tube red cup Pink buffer    | 0 | 0 |
| 51 | Swab | -     | 0 | Serological tube red cup Pink buffer    | 0 | 0 |
| 52 | Swab | -     | 0 | Serological tube red cup Pink buffer    | 0 | 0 |
| 53 | Swab | -     | 0 | Serological tube red cup Pink buffer    | 0 | 0 |
| 54 | Swab | -     | 0 | Serological tube red cup Pink buffer    | 0 | 0 |
| 55 | Swab | -     | 0 | Serological tube red cup Pink buffer    | 0 | 0 |
| 56 | Swab | -     | 0 | Serological tube red cup Pink buffer    | 0 | 0 |
| 57 | Swab | -     | 0 | Serological tube red cup Pink buffer    | 0 | 0 |
| 58 | Swab | -     | 0 | Serological tube red cup Pink buffer    | 0 | 0 |
| 59 | Swab | -     | 0 | 15 ml falcon orange cup clear buffer    | 0 | 0 |
| 60 | Swab | -     | 0 | 15 ml falcon orange cup clear buffer    | 0 | 0 |
| 61 | Swab | -     | 0 | 15 ml falcon orange cup clear buffer    | 0 | 0 |
| 62 | Swab | -     | 0 | 15 ml falcon orange cup clear buffer    | 0 | 0 |
| 63 | Swab | -     | 0 | Serological tube red cup Pink buffer    | 0 | 0 |
| 64 | Swab | +     | 1 | Serological tube blue cup yellow buffer | 1 | 1 |
| 65 | Swab | +     | 1 | Serological tube red cup Pink buffer    | 1 | 1 |
| 66 | Swab | 35.22 | 1 | Serological tube blue cup yellow buffer | 0 | 0 |
| 67 | Swab | -     | 0 | Falcon 15 ml Blue cap redish buffer     | 0 | 0 |
| 68 | Swab | 25.87 | 1 | Falcon 15 ml Blue cap redish buffer     | 0 | 0 |
| 69 | Swab | 18.76 | 1 | Falcon 15 ml Blue cap redish buffer     | 1 | 1 |
| 70 | Swab | -     | 0 | Falcon 15 ml Blue cap redish buffer     | 0 | 0 |
| 71 | Swab | +     | 1 | 15 ml falcon orange cup clear buffer    | 0 | 0 |
| 72 | Swab | +     | 1 | 15 ml falcon orange cup clear buffer    | 1 | 1 |
| 73 | Swab | +     | 1 | Falcon 15 ml Blue cap redish buffer     | 0 | 0 |
| 74 | Swab | 34.46 | 1 | Falcon 15 ml Blue cap redish buffer     | 0 | 0 |
| 75 | Swab | 32.31 | 1 | 15 ml falcon orange cup clear buffer    | 0 | 0 |
| 76 | Swab | 27.51 | 1 | Falcon 15 ml Blue cap redish buffer     | 0 | 0 |
| 77 | Swab | 19.58 | 1 | Serological tube red cup Pink buffer    | 0 | 0 |
| 78 | Swab | -     | 0 | Serological tube red cup Pink buffer    | 0 | 0 |
| 79 | Swab | 15.51 | 1 | 15 ml falcon orange cup clear buffer    | 1 | 1 |
| 80 | Swab | -     | 0 | 15 ml falcon orange cup clear buffer    | 0 | 0 |
| 81 | Swab | 24.22 | 1 | Serological tube red cup Pink buffer    | 1 | 1 |
| 82 | Swab | 30.47 | 1 | 15 ml falcon orange cup clear buffer    | 0 | 0 |
| 83 | Swab | 21.8  | 1 | Serological tube red cup Pink buffer    | 0 | 0 |

|    |      |       |   |                                      |   |   |
|----|------|-------|---|--------------------------------------|---|---|
| 84 | Swab | 23    | 1 | Serological tube red cup Pink buffer | 0 | 0 |
| 85 | Swab | 27.8  | 1 | Serological tube red cup Pink buffer | 1 | 1 |
| 86 | Swab | 37    | 1 | Serological tube red cup Pink buffer | 0 | 0 |
| 87 | Swab | 32    | 1 | Serological tube red cup Pink buffer | 0 | 0 |
| 88 | Swab | 26.72 | 1 | Serological tube red cup Pink buffer | 0 | 0 |
| 89 | Swab | -     | 0 | Serological tube red cup Pink buffer | 0 | 0 |
| 90 | Swab | 35.6  | 1 | Falcon 15 ml Blue cap redish buffer  | 0 | 0 |
| 91 | Swab | 32.6  | 1 | Serological tube red cup Pink buffer | 0 | 0 |
| 92 | Swab | 31.95 | 1 | Serological tube red cup Pink buffer | 0 | 0 |
| 93 | Swab | -     | 0 | Serological tube red cup Pink buffer | 0 | 0 |
| 94 | Swab | -     | 0 | Serological tube red cup Pink buffer | 0 | 0 |
| 95 | Swab | -     | 0 | Serological tube red cup Pink buffer | 0 | 0 |
| 96 | Swab | 35.3  | 1 | Serological tube red cup Pink buffer | 0 | 0 |
| 97 | Swab | 26.7  | 1 | Serological tube red cup Pink buffer | 0 | 0 |
| 98 | Swab | 28.72 | 1 | Serological tube red cup Pink buffer | 0 | 0 |
| 99 | Swab | -     | 0 | Falcon 15 ml Blue cap redish buffer  | 0 | 0 |

**Supplementary Table 2:**

| Sample# | Sample type | CT    | RT-PCR result | Test results t(30) min (0-negative, 1-positive) | Test results t(35) min (0-negative, 1-positive) | Test results t(40) min (0-negative, 1-positive) |
|---------|-------------|-------|---------------|-------------------------------------------------|-------------------------------------------------|-------------------------------------------------|
| 1       | swab        | 26.48 | 1             | 1                                               | 1                                               | 1                                               |
| 2       | swab        | 28.02 | 1             | 1                                               | 1                                               | 1                                               |
| 3       | swab        | 30.07 | 1             | 0                                               | 0                                               | 0                                               |
| 4       | swab        | 32.64 | 1             | 0                                               | 0                                               | 0                                               |
| 5       | swab        | 19.2  | 1             | 1                                               | 1                                               | 1                                               |
| 6       | swab        | 23.18 | 1             | 1                                               | 1                                               | 1                                               |
| 7       | swab        | 28.7  | 1             | 1                                               | 1                                               | 1                                               |
| 8       | swab        | 17.38 | 1             | 1                                               | 1                                               | 1                                               |
| 9       | swab        | 25.06 | 1             | 0                                               | 1                                               | 1                                               |
| 10      | swab        | 24.43 | 1             | 1                                               | 1                                               | 1                                               |
| 11      | swab        | 14.9  | 1             | 1                                               | 1                                               | 1                                               |
| 12      | swab        | 28.88 | 1             | 1                                               | 1                                               | 1                                               |
| 13      | swab        | 27.26 | 1             | 1                                               | 1                                               | 1                                               |
| 14      | swab        | 13.4  | 1             | 1                                               | 1                                               | 1                                               |
| 15      | swab        | 27.03 | 1             | 0                                               | 1                                               | 1                                               |
| 16      | swab        | 23.71 | 1             | 1                                               | 1                                               | 1                                               |
| 17      | swab        | 27.08 | 1             | 0                                               | 0                                               | 0                                               |
| 18      | swab        | 21.19 | 1             | 1                                               | 1                                               | 1                                               |
| 19      | swab        | 18.77 | 1             | 1                                               | 1                                               | 1                                               |
| 20      | swab        | 21.6  | 1             | 1                                               | 1                                               | 1                                               |
| 21      | swab        | 20.25 | 1             | 1                                               | 1                                               | 1                                               |
| 22      | swab        | 26.49 | 1             | 1                                               | 1                                               | 1                                               |
| 23      | swab        | 25.87 | 1             | 0                                               | 1                                               | 1                                               |
| 24      | swab        | 25.84 | 1             | 1                                               | 1                                               | 1                                               |
| 25      | swab        | 15.26 | 1             | 1                                               | 1                                               | 1                                               |
| 26      | swab        | 15.51 | 1             | 1                                               | 1                                               | 1                                               |
| 27      | swab        | 21.44 | 1             | 1                                               | 1                                               | 1                                               |
| 28      | swab        | 23.6  | 1             | 1                                               | 1                                               | 1                                               |
| 29      | swab        | 15.22 | 1             | 1                                               | 1                                               | 1                                               |
| 30      | swab        | 26.77 | 1             | 0                                               | 0                                               | 1                                               |
| 31      | swab        | 27    | 1             | 1                                               | 1                                               | 1                                               |
| 32      | swab        | 16.15 | 1             | 1                                               | 1                                               | 1                                               |
| 33      | swab        | 27.57 | 1             | 1                                               | 1                                               | 1                                               |
| 34      | swab        | 25.72 | 1             | 1                                               | 1                                               | 1                                               |
| 35      | swab        | 24.03 | 1             | 1                                               | 1                                               | 1                                               |
| 36      | swab        | 25.99 | 1             | 0                                               | 0                                               | 0                                               |
| 37      | swab        | 26.01 | 1             | 1                                               | 1                                               | 1                                               |

|    |      |       |   |   |   |   |
|----|------|-------|---|---|---|---|
| 38 | swab | 26.29 | 1 | 1 | 1 | 1 |
| 39 | swab | 23.49 | 1 | 1 | 1 | 1 |
| 40 | swab | 29.25 | 1 | 0 | 0 | 0 |
| 41 | swab | 29.84 | 1 | 0 | 0 | 0 |
| 42 | swab | 19.1  | 1 | 1 | 1 | 1 |
| 43 | swab | 28.81 | 1 | 0 | 0 | 0 |
| 44 | swab | 26.04 | 1 | 1 | 1 | 1 |
| 45 | swab | 18.55 | 1 | 1 | 1 | 1 |
| 46 | swab | 34.41 | 1 | 0 | 0 | 0 |
| 47 | swab | 33.96 | 1 | 0 | 0 | 0 |
| 48 | swab | 21.82 | 1 | 1 | 1 | 1 |
| 49 | swab | 31.82 | 1 | 1 | 1 | 1 |
| 50 | swab | 33.34 | 1 | 0 | 0 | 0 |
| 51 | swab | 27.91 | 1 | 1 | 1 | 1 |
| 57 | swab | 26.72 | 1 | 0 | 0 | 1 |
| 52 | swab | -     | 0 | 0 | 0 | 0 |
| 53 | swab | -     | 0 | 0 | 0 | 0 |
| 54 | swab | -     | 0 | 0 | 0 | 0 |
| 55 | swab | -     | 0 | 1 | 1 | 1 |
| 56 | swab | -     | 0 | 0 | 0 | 0 |
| 58 | swab | -     | 0 | 0 | 0 | 0 |
| 59 | swab | -     | 0 | 0 | 0 | 0 |
| 60 | swab | -     | 0 | 0 | 0 | 0 |
| 61 | swab | -     | 0 | 0 | 0 | 0 |
| 62 | swab | -     | 0 | 0 | 0 | 0 |
| 63 | swab | -     | 0 | 0 | 0 | 0 |
| 64 | swab | -     | 0 | 0 | 0 | 0 |
| 65 | swab | -     | 0 | 0 | 0 | 0 |
| 66 | swab | -     | 0 | 0 | 0 | 0 |
| 67 | swab | -     | 0 | 0 | 0 | 0 |
| 68 | swab | -     | 0 | 0 | 0 | 0 |
| 69 | swab | -     | 0 | 0 | 0 | 0 |
| 70 | swab | -     | 0 | 0 | 0 | 0 |
| 71 | swab | -     | 0 | 0 | 0 | 0 |
| 72 | swab | -     | 0 | 0 | 0 | 0 |
| 73 | swab | -     | 0 | 0 | 0 | 0 |
| 74 | swab | -     | 0 | 0 | 0 | 0 |
| 75 | swab | -     | 0 | 0 | 0 | 0 |
| 76 | swab | -     | 0 | 0 | 0 | 0 |
| 77 | swab | -     | 0 | 0 | 0 | 0 |
| 78 | swab | -     | 0 | 0 | 0 | 0 |
| 79 | swab | -     | 0 | 0 | 0 | 0 |
| 80 | swab | -     | 0 | 0 | 0 | 0 |
| 81 | swab | -     | 0 | 0 | 0 | 0 |
| 82 | swab | -     | 0 | 0 | 0 | 0 |
| 83 | swab | -     | 0 | 0 | 0 | 0 |
